# Supplementary material for: Can Human Handling Increase the Presence of Multidrug Resistance (MDR) in Salmonella spp. Isolated from Food Sources?
Source: MDPI journal article supplement (doi:10.3390/microorganisms9102018), 2021-09-23
Supplement: s1 [file s1]

**Table S1.** Source, serotyping and antibiotic resistance of *Salmonella* spp. analysed ( $n = 63$ ).

| Id. Strain | Source                       | Serotyping                               | Antibiotic Resistance        |
|------------|------------------------------|------------------------------------------|------------------------------|
| 1          | Ovine                        | <i>S. Typhimurium</i> Monophasic Variant | AMP                          |
| 2          | Ovine                        | <i>S. Typhimurium</i> Monophasic Variant | AMP                          |
| 3          | Ovine                        | <i>S. Montevideo</i>                     | *                            |
| 4          | Ovine                        | <i>S. Derby</i>                          | *                            |
| 5          | Ovine                        | <i>S. Elomrane</i>                       | *                            |
| 6          | Ovine                        | <i>S. Muenster</i>                       | *                            |
| 7          | Ovine                        | <i>S. Muenster</i>                       | *                            |
| 8          | Ovine                        | <i>S. Derby</i>                          | *                            |
| 9          | Bovine                       | <i>S. Muenster</i>                       | *                            |
| 10         | Swine                        | <i>S. Derby</i>                          | *                            |
| 11         | Swine                        | <i>S. Derby</i>                          | *                            |
| 12         | Swine                        | <i>S. Typhimurium</i>                    | *                            |
| 13         | Swine                        | <i>S. Derby</i>                          | *                            |
| 14         | Swine                        | <i>S. Derby</i>                          | *                            |
| 15         | Swine                        | <i>S. Typhimurium</i> Monophasic Variant | TET                          |
| 16         | Swine                        | <i>S. Kedougou</i>                       | *                            |
| 17         | Dog                          | <i>S. Typhimurium</i> Monophasic Variant | GEN, TOB, AMP, TET           |
| 18         | Dog                          | <i>S. Goldcoast</i>                      | TET                          |
| 19         | Dog                          | <i>S. Goldcoast</i>                      | TET                          |
| 20         | Dog                          | <i>S. Typhimurium</i>                    | AMP, TET                     |
| 21         | Dog                          | <i>S. Typhimurium</i>                    | AMP, TET                     |
| 22         | Dog                          | <i>S. Typhimurium</i>                    | *                            |
| 23         | Dog                          | <i>S. Typhimurium</i>                    | *                            |
| 24         | Dog                          | <i>S. Enteritidis</i>                    | *                            |
| 25         | Dog                          | <i>S. Typhimurium</i>                    | TET                          |
| 26         | Dog                          | <i>S. Enteritidis</i>                    | *                            |
| 27         | Dog                          | <i>S. Elomrane</i>                       | *                            |
| 28         | Dog                          | <i>S. Schleissheim</i>                   | *                            |
| 29         | <i>Python regius</i>         | <i>S. Bahrenfeld</i>                     | *                            |
| 30         | <i>Trachemys scripta</i>     | <i>S. Richmond</i>                       | *                            |
| 31         | <i>Iguana iguana</i>         | <i>S. Potsdam</i>                        | *                            |
| 32         | <i>Trachemys scripta</i>     | <i>S. Kiambu</i>                         | *                            |
| 33         | <i>Trachemys scripta</i>     | <i>S. Typhimurium</i>                    | AMP, TET                     |
| 34         | <i>Carduelis carduelis</i>   | <i>S. Typhimurium</i>                    | AMP, TET                     |
| 35         | <i>Nymphicus hollandicus</i> | <i>S. Richmond</i>                       | *                            |
| 36         | <i>Carduelis carduelis</i>   | <i>S. Infantis</i>                       | KAN, AMP, NAL, SXT, TET      |
| 37         | <i>Testudo hermanni</i>      | <i>S. Newport</i>                        | TET                          |
| 38         | <i>Testudo hermanni</i>      | <i>S. Heron</i>                          | *                            |
| 39         | <i>Testudo hermanni</i>      | <i>S. bongori</i>                        | *                            |
| 40         | <i>Sus scrofa</i>            | <i>S. Elomrane</i>                       | *                            |
| 41         | <i>Oryctolagus cuniculus</i> | <i>S. Veneziana</i>                      | *                            |
| 42         | <i>Testudo hermanni</i>      | <i>S. Abony</i>                          | *                            |
| 43         | <i>Testudo hermanni</i>      | <i>S. Tennessee</i>                      | NAL                          |
| 44         | <i>Ardea cinerea</i>         | <i>S. Enteritidis</i>                    | *                            |
| 45         | <i>Stenella coeruleoalba</i> | <i>S. Typhimurium</i>                    | AMP, TET                     |
| 46         | <i>Caretta caretta</i>       | <i>S. Enteritidis</i>                    | *                            |
| 47         | <i>Mobula mobular</i>        | <i>S. Typhimurium</i>                    | *                            |
| 48         | Turkey meat                  | <i>S. Typhimurium</i>                    | *                            |
| 49         | Turkey meat                  | <i>S. Newport</i>                        | KAN, AMP, SXT, TET           |
| 50         | Bovine meat                  | <i>S. Infantis</i>                       | KAN, AMP, FOT, NAL, TET      |
| 51         | Bovine meat                  | <i>S. Infantis</i>                       | KAN, AMP, FOT, NAL, SXT, TET |
| 52         | Poultry meat                 | <i>S. Infantis</i>                       | AMP, FOT, NAL, SXT, TET      |

|    |              |                       |                    |
|----|--------------|-----------------------|--------------------|
| 53 | Poultry meat | <i>S. Infantis</i>    | KAN, NA, SXT, TET  |
| 54 | Poultry meat | <i>S. Infantis</i>    | TET                |
| 55 | Poultry meat | <i>S. Kentucky</i>    | *                  |
| 56 | Poultry meat | <i>S. Kentucky y</i>  | *                  |
| 57 | Poultry meat | <i>S. Infantis</i>    | NAL, SXT, TET      |
| 58 | Poultry meat | <i>S. Infantis</i>    | KAN, NAL, SXT, TET |
| 59 | Eggs         | <i>S. Enteritidis</i> | *                  |
| 60 | Mytiles      | <i>S. Aberdeen</i>    | AMP, TET           |
| 61 | Mytiles      | <i>S. Bredeney</i>    | *                  |
| 62 | Mytiles      | <i>S. Bredeney</i>    | *                  |
| 63 | Clams        | <i>S. Kentucky</i>    | *                  |

---

Kanamycin (KAN); Gentamicin (GEN); Tobramycin (TOB); Ampicillin (AMP); Cefotaxime (FOT); Nalidixic Acid (NAL); Sulphamethoxazole/Trimethoprim (STX); Tetracycline (TET); \*no resistance detected.
